# Supplementary material for: Aromatic sulfonation with sulfur trioxide: mechanism and kinetic model
Source: PubMed Central journal article supplement — Chem Sci. 2016 Sep 12;8(1):680–8. doi: 10.1039/c6sc03500k (PMC5297940; doi:10.1039/c6sc03500k), 2016-09-12
Supplement: SC-008-C6SC03500K-s001.pdf [file SC-008-C6SC03500K-s001.pdf]

## SUPPORTING INFORMATION

### Aromatic Sulfonation with Sulfur Trioxide: Mechanism and Kinetic Model

Samuel L.C. Moors<sup>a\*</sup>, Xavier Deraet<sup>a</sup>, Guy Van Assche<sup>b</sup>, Paul Geerlings<sup>a</sup>, Frank De Proft<sup>a</sup>

<sup>a</sup>Eenheid Algemene Chemie (ALGC), Vrije Universiteit Brussel (VUB), Pleinlaan 2, 1050 Elsene, Brussels, Belgium

<sup>b</sup>Physical Chemistry and Polymer Science (FYSC), Vrije Universiteit Brussel (VUB), Pleinlaan 2, 1050 Elsene, Brussels, Belgium

\*samuel.moors@vub.ac.be

#### **Table of contents**

##### COMPUTATIONAL DETAILS

|                                                                                                                                                                                                  |      |
|--------------------------------------------------------------------------------------------------------------------------------------------------------------------------------------------------|------|
| Metadynamics of benzene-S <sub>2</sub> O <sub>6</sub> $\sigma$ -complex in CH <sub>3</sub> NO <sub>2</sub>                                                                                       | p. 2 |
| Low temperature MD of the $\sigma$ -complex intermediate in CH <sub>3</sub> NO <sub>2</sub>                                                                                                      | p. 2 |
| Table S1. Mean geometric parameters at transition states and intermediate state                                                                                                                  | p. 3 |
| Figure S1. PMFs from twelve 1D rMTD simulations of benzene-S <sub>2</sub> O <sub>6</sub> $\sigma$ -complex                                                                                       | p. 4 |
| Figure S2. Evolution of geometric parameters of the benzene-S <sub>2</sub> O <sub>6</sub> $\sigma$ -complex intermediate state in CH <sub>3</sub> NO <sub>2</sub> from an AIMD simulation at 1 K | p. 5 |

## COMPUTATIONAL DETAILS

### Metadynamics of benzene-S<sub>2</sub>O<sub>6</sub> $\sigma$ -complex in CH<sub>3</sub>NO<sub>2</sub>

An estimate of the additional free energy barrier required for sulfonation of the benzene-SO<sub>3</sub>  $\sigma$ -complex with 1 assisting SO<sub>3</sub> in CH<sub>3</sub>NO<sub>2</sub> is obtained with restrained MTD (rMTD), keeping the C-S<sub>1</sub> restrained to  $CN_{CS} = 0.5-0.6$  with a harmonic potential. A single CV is defined as the coordination number  $CN_{CO}$ , which tracks the distance between the benzene C1 and the three O atoms of the assisting SO<sub>3</sub>. Hill width = 0.02 and hill height = 0.2 kJ/mol. A set of twelve independent rMTD simulations is started from the benzene-SO<sub>3</sub>  $\sigma$ -complex + 1 assisting SO<sub>3</sub> and terminated as soon as the sulfonation reaction has taken place. From the set of 12 PMFs, an average PMF is calculated (Figure S1).

### Low temperature MD of the $\sigma$ -complex intermediate in CH<sub>3</sub>NO<sub>2</sub>

To verify if a metastable  $\sigma$ -complex intermediate state may exist, geometry optimization is performed of a snapshot located at TS from a MTD simulation in CH<sub>3</sub>NO<sub>2</sub> solvent, followed by low-temperature MD (T = 1 K). A geometry similar to the previously optimized intermediate state<sup>1</sup> is formed, which remains stable for at least 40 ps (Figure S2).

1. G. Koleva, B. Galabov, J. Kong, H. F. Schaefer and P. v. R. Schleyer, *Journal of the American Chemical Society*, 2011, 133, 19094-19101.

Table S1. Mean geometric parameters at transition states and intermediate state.

| participants                                          |         |                                 |     | $N^a$              | $r_{CS}$ (Å) | $r_{CH}$ (Å) | $r_{OH}$ (Å)       | $\alpha_{CCH}$ (°) |
|-------------------------------------------------------|---------|---------------------------------|-----|--------------------|--------------|--------------|--------------------|--------------------|
| 2 SO <sub>3</sub>                                     | 2D MTD  | gas phase                       | TS  | 3                  | 1.877        | 1.167        | 1.517              | 129                |
|                                                       |         | CCl <sub>3</sub> F              | TS  | 3                  | 1.853        | 1.114        | 1.604              | 118                |
|                                                       |         | CH <sub>3</sub> NO <sub>2</sub> | TS  | 3                  | 1.830        | 1.112        | 1.629              | 114                |
|                                                       | rMD     | gas phase                       | TS  | 2                  | 1.862        | 1.197        | 1.510              | 118                |
|                                                       |         | CCl <sub>3</sub> F              | TS  | 2                  | 1.848        | 1.197        | 1.562              | 113                |
|                                                       | 1D rMTD | CH <sub>3</sub> NO <sub>2</sub> | TS  | 11                 | 1.859        | 1.131        | 1.584              | 112                |
|                                                       | MD (1K) | CH <sub>3</sub> NO <sub>2</sub> | I   | 15 ps <sup>b</sup> | 1.957        | 1.121        | 1.934              | 129                |
| 2 SO <sub>3</sub> + 1 CH <sub>3</sub> NO <sub>2</sub> | 1D rMTD | CH <sub>3</sub> NO <sub>2</sub> | TS1 | 1                  | 1.847        | 1.098        | 1.731 <sup>c</sup> | 104                |
| 1 SO <sub>3</sub> + 1 H <sub>2</sub> SO <sub>4</sub>  | rMD     | gas phase                       | TS1 | 1                  | 1.893        | 1.131        | 1.656 <sup>d</sup> | 136                |
|                                                       |         | CCl <sub>3</sub> F              | TS1 | 1                  | 1.863        | 1.127        | 1.708 <sup>d</sup> | 106                |
|                                                       |         | CH <sub>3</sub> NO <sub>2</sub> | TS2 | 1                  | 1.869        | 1.095        | 1.621 <sup>d</sup> | 115                |

<sup>a</sup>number of geometries of which mean parameters are calculated.

<sup>b</sup>mean over over last 15 ps of a 40-ps simulation.

<sup>c</sup>minimal H<sub>1</sub>-O distance between benzene and CH<sub>3</sub>NO<sub>2</sub>.

<sup>d</sup>minimal H<sub>1</sub>-O distance between benzene and H<sub>2</sub>SO<sub>4</sub>.

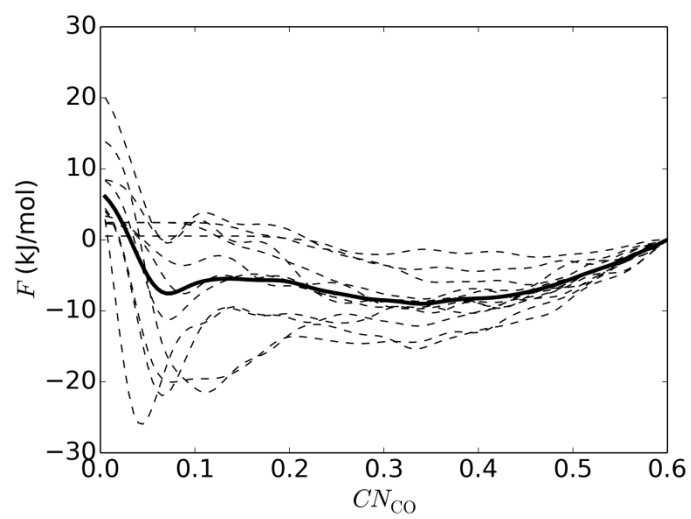

Figure S1. PMFs from twelve 1D rMTD simulations of the benzene-S<sub>2</sub>O<sub>6</sub>  $\sigma$ -complex (dashed lines), and mean free energy profile (full line).

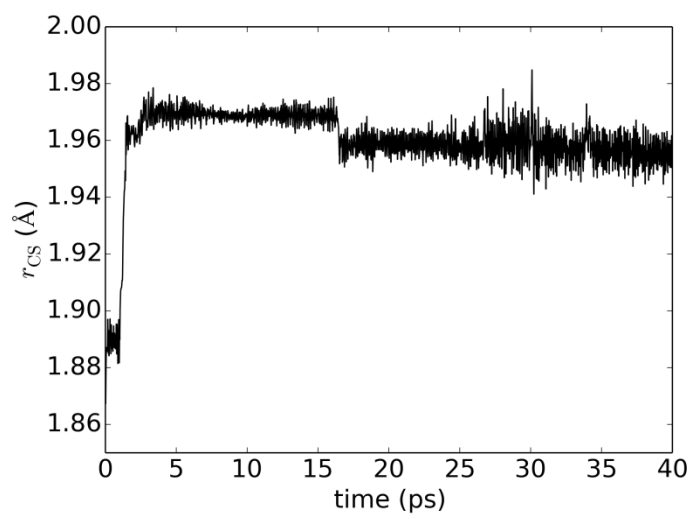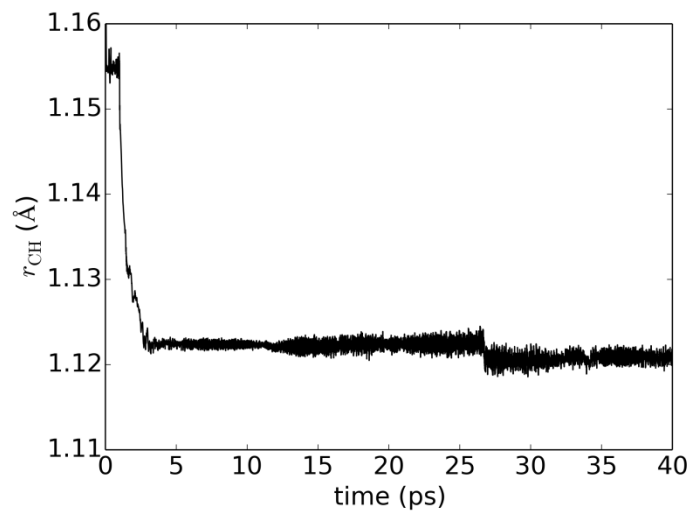

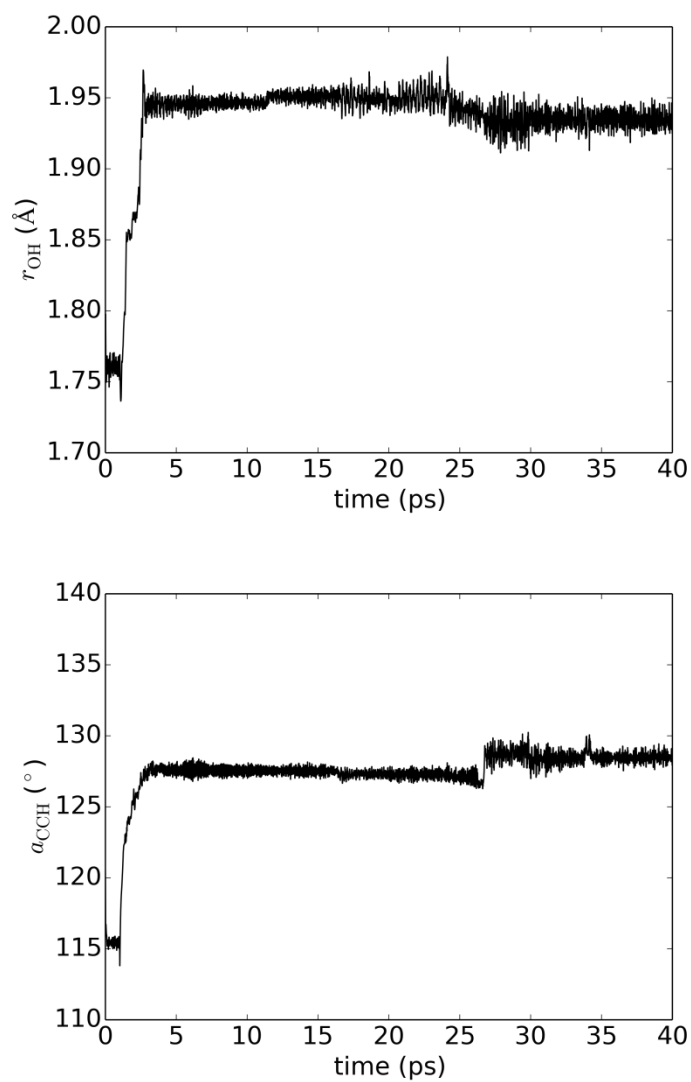

Figure S2. Evolution of geometric parameters of the benzene-S<sub>2</sub>O<sub>6</sub>  $\sigma$ -complex intermediate state in CH<sub>3</sub>NO<sub>2</sub> from an AIMD simulation at 1 K. From top to bottom: C<sub>1</sub>-S<sub>1</sub> distance, C<sub>1</sub>-H<sub>1</sub> distance, minimal O<sub>2</sub>-H<sub>1</sub> distance, C<sub>4</sub>-C<sub>1</sub>-H<sub>1</sub> angle.
